# Supplementary material for: Saliva sampling strategies affecting the salivary glucose measurement
Source: Royal Society of Chemistry journal article supplement (doi:10.1039/d3ay01005h), 2023-01-01
Supplement: d3ay01005h1.pdf [file d3ay01005h1.pdf]

# Saliva Sampling Strategies Affecting the Salivary Glucose Measurement

*Xia Qian<sup>1,2</sup>, Anthony Ko<sup>2</sup>, Haifeng Li<sup>3</sup>, Caizhi Liao<sup>2\*</sup>*

1. Medical School, Sun Yat-Sen University, Guangzhou, China
2. Renaissance Bio, New Territories, Hong Kong SAR, China
3. Shenzhen People's Hospital, Shenzhen, China

## Corresponding Author:

Dr. Caizhi Liao

Renaissance Bio, Hong Kong SAR

Email: [c.liao@uqconnect.edu.au](mailto:c.liao@uqconnect.edu.au)

**Table S1.** Baseline characteristics of subjects

|                                        |                     |
|----------------------------------------|---------------------|
| Total recruited patients               | 74                  |
| Male                                   | 40 (54.05%)         |
| Female                                 | 34 (45.95%)         |
| Health conditions                      |                     |
| Healthy                                | 74 (100 %)          |
| Diabetic                               | 0 (0 %)             |
| Averaged age                           | 36.5 ± 12.5 (24-49) |
| Body mass index (BMI)                  | 27 ± 9 (18-36)      |
| Body fat (%)                           | 22.3± 2.3           |
| Demography                             |                     |
| South China                            | 23 (31.08 %)        |
| North China                            | 11 (14.86 %)        |
| East China                             | 26 (35.14 %)        |
| Central China                          | 14 (18.92 %)        |
| Covid-19 Infection                     |                     |
| Recovered                              | 63 (85.14%)         |
| Currently Infected                     | 1 (1.35%)           |
| Not infected previously/Not sure       | 10 (13.51%)         |
| Other diseases conditions              |                     |
| Cardiovascular disease                 | 6 (8.11 %)          |
| Respiratory disease                    | 2 (2.70 %)          |
| Without recorded disease/Not Confirmed | 66 (89.19 %)        |

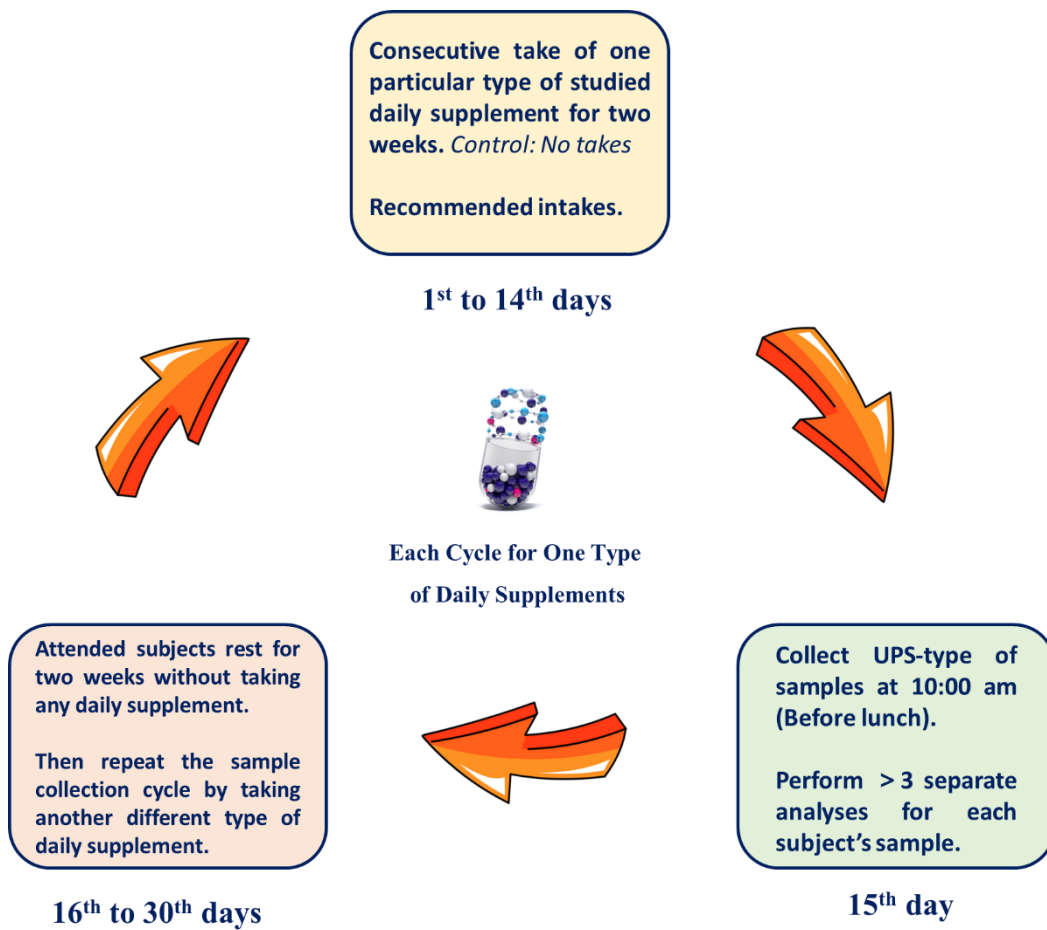

**Figure S1.** The saliva collection protocol for the study of daily supplements takes impacts.

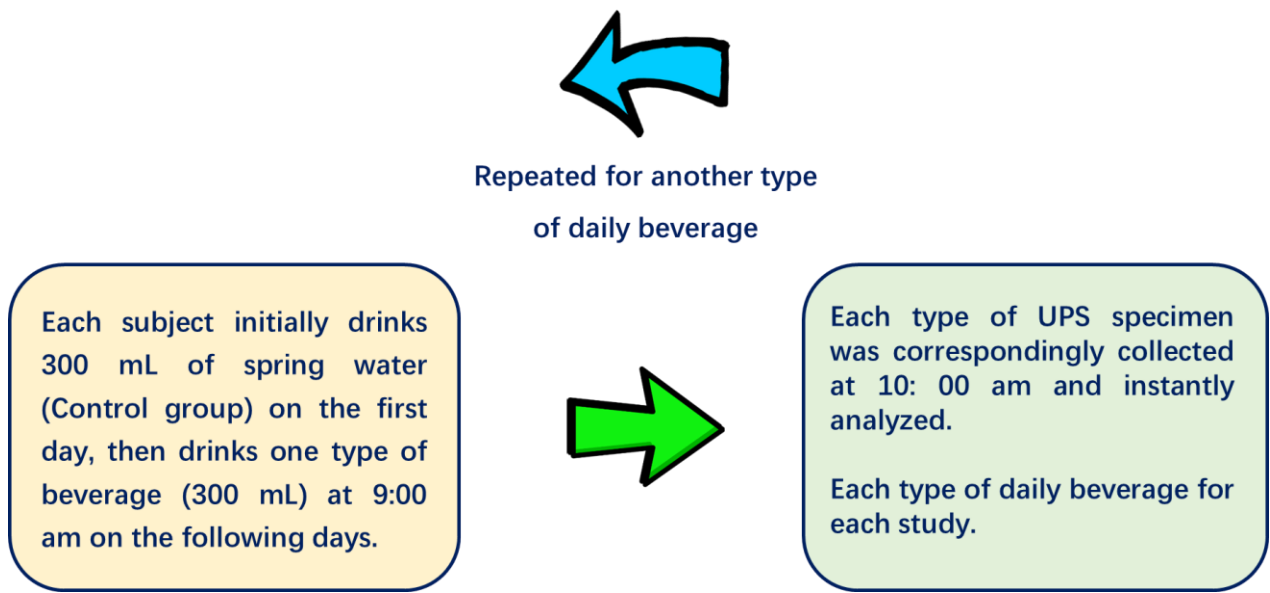

**Figure S2.** The saliva collection protocol for the study of daily beverage drinking impacts.

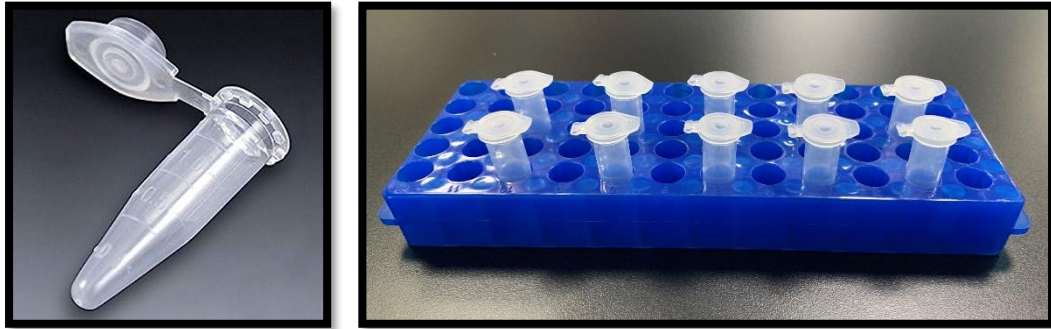

**Figure S3.** Pictures show the 2 mL centrifuge tube for sample storage and the storage placement/orientation in the study of storage stability.

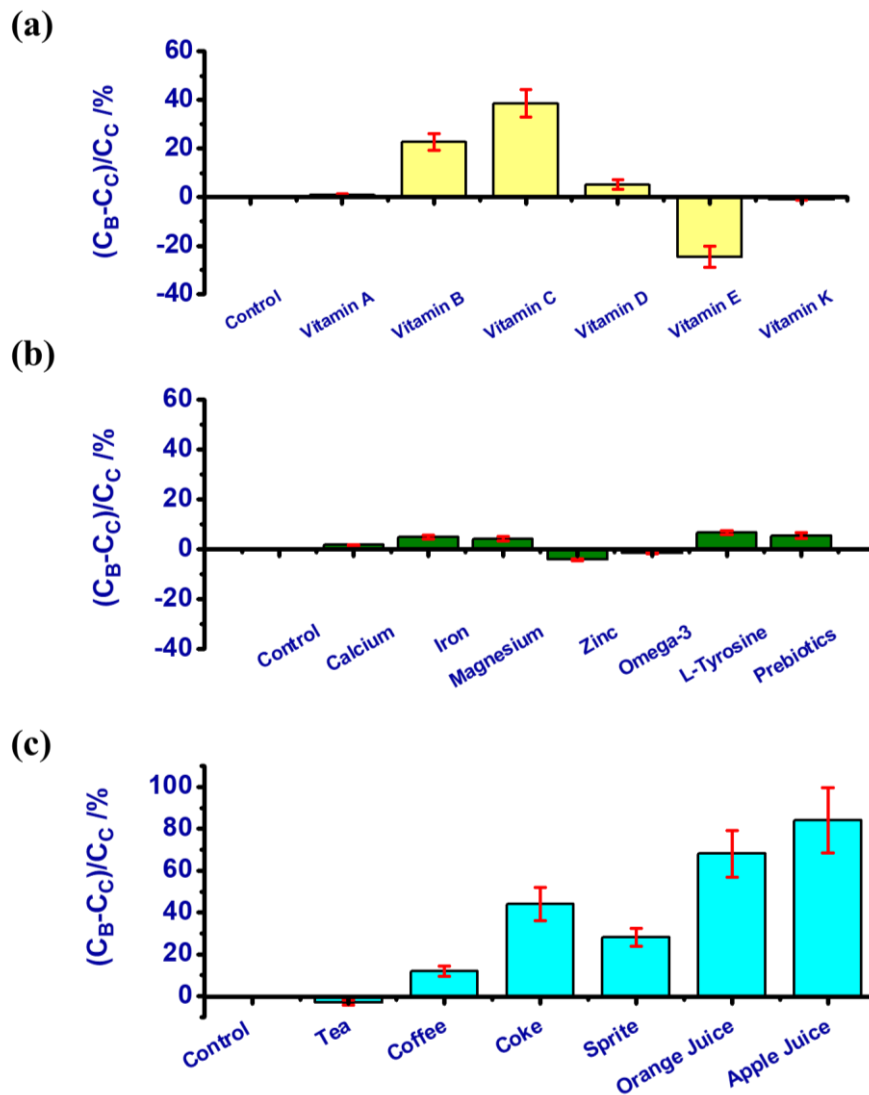

**Figure S4.** (a) The effect of daily vitamins (A, B, C, D, E, and K) takes on SGM analysis relative to the control group (changes in %), control group: 300mL of spring water. (b) The effect of daily supplements (calcium, iron, magnesium, zinc, omega-3, L-tyrosine, and prebiotics) takes on SGM analysis relative to the control group (changes in %), control group: 300mL of spring water. (c) The effect of beverage drinks (tea, coffee, coke, sprite, orange juice, and apple juice) on SGM analysis relative to the control group (changes in %), control group: 300mL of spring water.

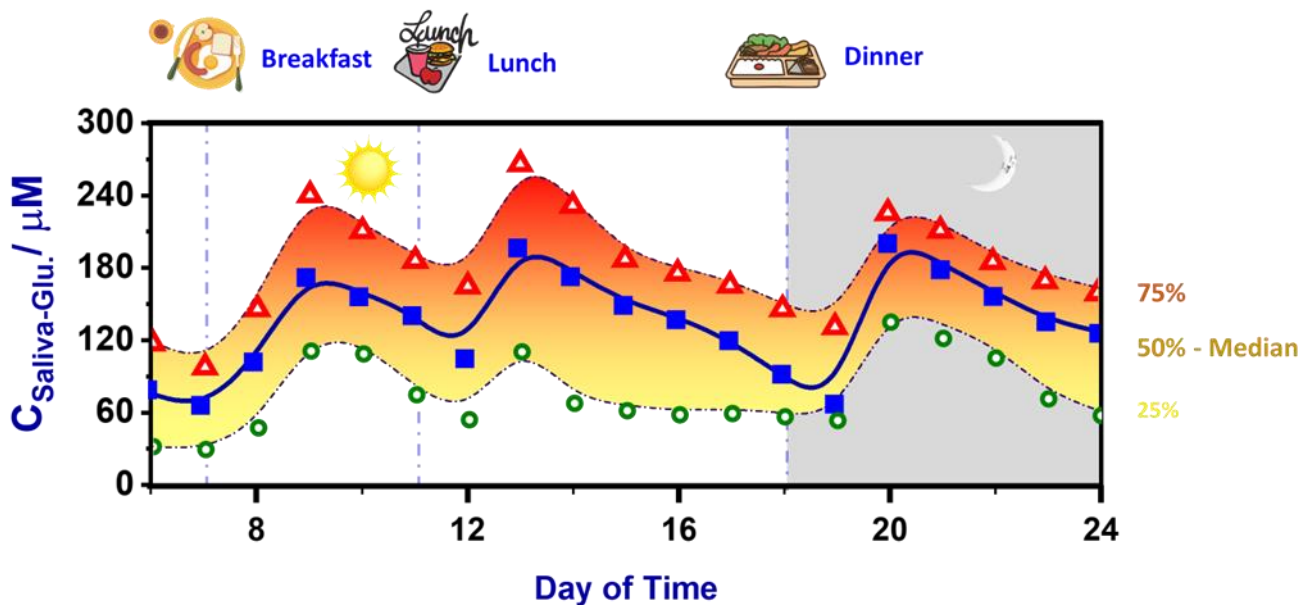

**Figure S5.** Continuous SGM during the time 6:00 am to 12:00 am (the next day). Without further clarification, each subject takes a seem-alike typical diet and collects saliva samples (UPS type) every 30 mins for instant analysis. Breakfast time: 7:00 am, lunchtime: 11:00 am, dinner time: 6:00 pm. The triangle, square, and circular dots represent the acquired actual data for every 30 mins.
